# Supplementary material for: Selective yields of furfural and hydroxymethylfurfural from glucose in tetrahydrofuran over Hβ zeolite
Source: Royal Society of Chemistry journal article supplement (doi:10.1039/c8ra04060e), 2018-01-01
Supplement: c8ra04060e1.pdf [file c8ra04060e1.pdf]

## **Selective Yields of Furfural and Hydroxymethylfurfural from Glucose in Tetrahydrofuran over H $\beta$ Zeolite $\dagger$**

Jin Tan<sup>a,b,c</sup>, Haiyong Wang<sup>a,b,c</sup>, Longlong Ma<sup>a,b,c\*</sup>, Chenguang Wang<sup>a,b,c</sup>, Qiying  
Liu<sup>a,b,c</sup>, Qi Zhang<sup>a,b,c</sup>, Minghong He<sup>a,b,c</sup>

<sup>a</sup>Guangzhou Institute of Energy Conversion, Chinese Academy of Sciences (CAS),  
510640, Guangzhou, China.

<sup>b</sup>CAS Key Laboratory of Renewable Energy, 510640, Guangzhou, China.

<sup>c</sup>Guangdong Provincial Key Laboratory of New and Renewable Energy Research and  
Development, 510640, Guangzhou, China.

\* E-mail: [mall@ms.giec.ac.cn](mailto:mall@ms.giec.ac.cn)

## 1 Catalyst characterization

### 1.1 Procedures for XRD test

The crystalline structure of catalysts were characterized by X-ray diffraction (XRD) (X Pert Pro MPD with Cu K $\alpha$  radiation, Philip) operated at 40 kV and 30 mA. The scanning angle ( $2\theta$ ) ranged from 5° to 80° and they were recorded with 0.0167° steps.

### 1.2 Procedures for TG-DTA test

The thermo-gravity - differential thermal analysis (TG-DTA) results of used catalyst was performed on a STA HP/2 instrument (air atmosphere 50 mL/min and heating rate of 10 Kmin<sup>-1</sup>). Prior to the test, the used catalyst was dried in air at 393 K for 24 h.

### 1.3 Procedures for Py-IR test

Py-IR was performed in Vertex 70 (Bruker) FT-IR spectrophotometer with a deuterium triglycine sulfate (DTGS) detector. For each run, the sample was pressed into self-supporting wafers and degassed in vacuum at 573 K for 1 h followed by exposure to pyridine vapor. then, the Py-IR spectra were measured at 473 K after applying vacuum for 30 min. The quantification of Brønsted and Lewis acid sites was estimated from the integrated area of adsorption bands at 1540 cm<sup>-1</sup> and 1450 cm<sup>-1</sup> respectively.

### 1.4 Procedures for BET test

The Brunauer-Emmett-Teller (BET) surface area, external surface area, pore volume were determined by nitrogen adsorption at 77 K using a QUADRASORB SI analyzer equipped with QuadraWin software system. All samples were degassed at 573 K for 8 h before adsorption measurement. After measurement, surface areas were calculated

by the BET method and micropore volumes were calculated with the T-plot method.

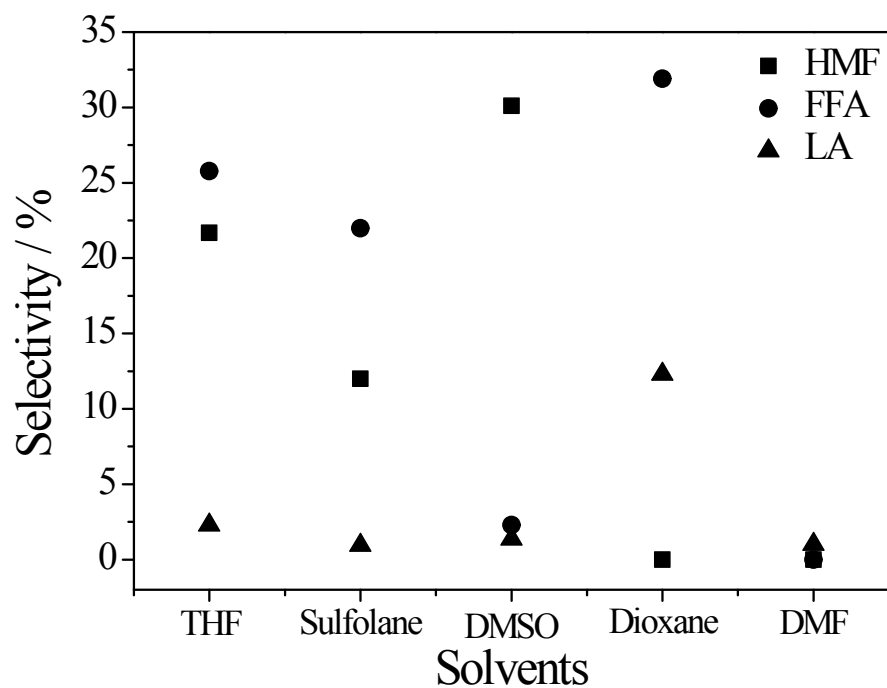

**Fig. S1** Selectivities of different products in various solvents.

Reaction conditions: 0.5 g glucose, 0.1 g H $\beta$  zeolite, 9.5 g solvent, 453 K, 120 min.

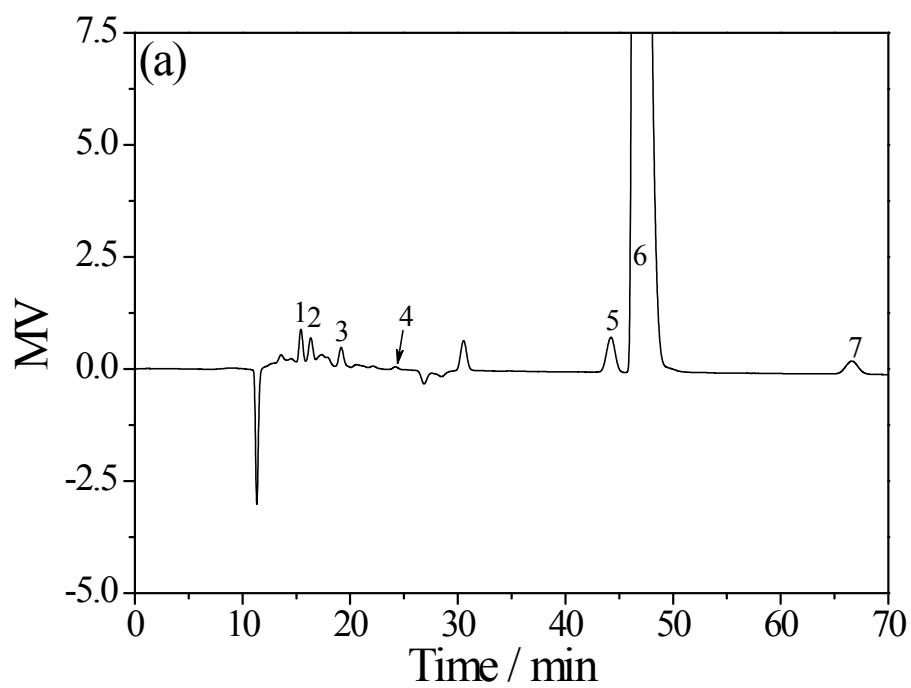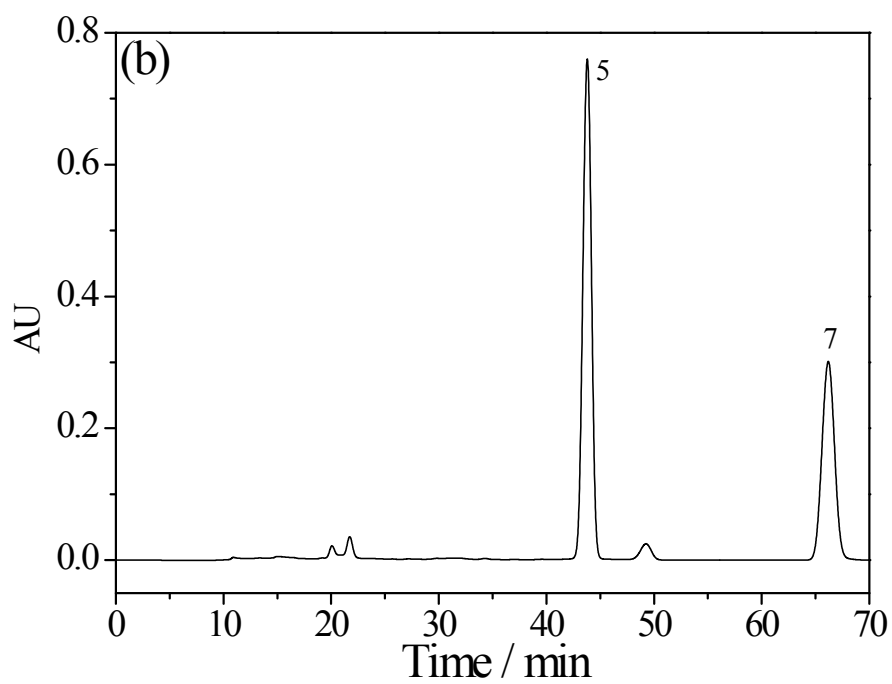

**Fig. S2** HPLC chromatograms of the products produced from glucose in THF/water.

(a) refractive index detector, (b) UV detector. 1) glucose, 2) fructose, 3) formic acid, 4)

LA, 5) HMF, 6) THF, 7) FFA.

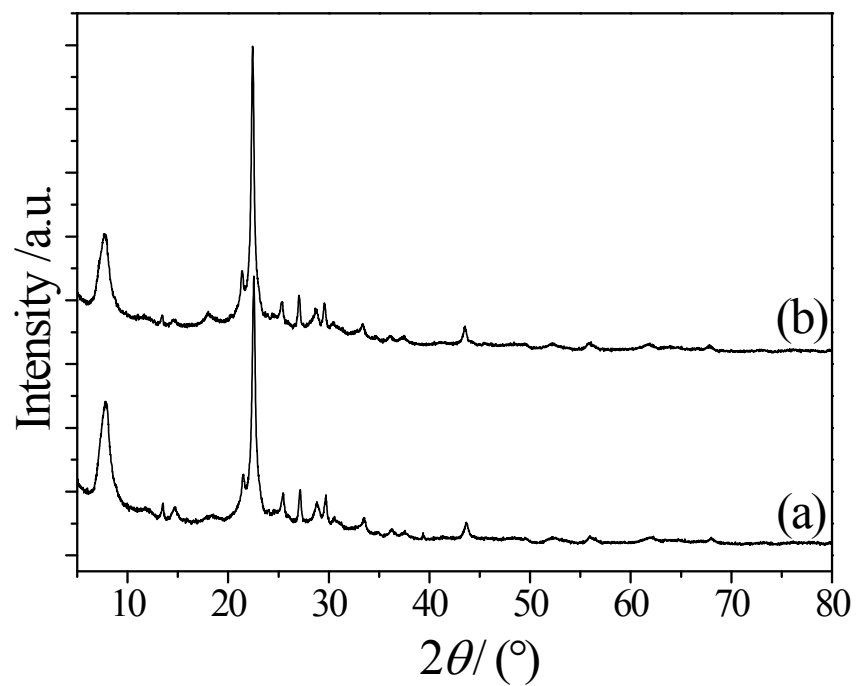

**Fig. S3** XRD patterns of H $\beta$  zeolite before and after reaction. (a) fresh, (b) after reaction.

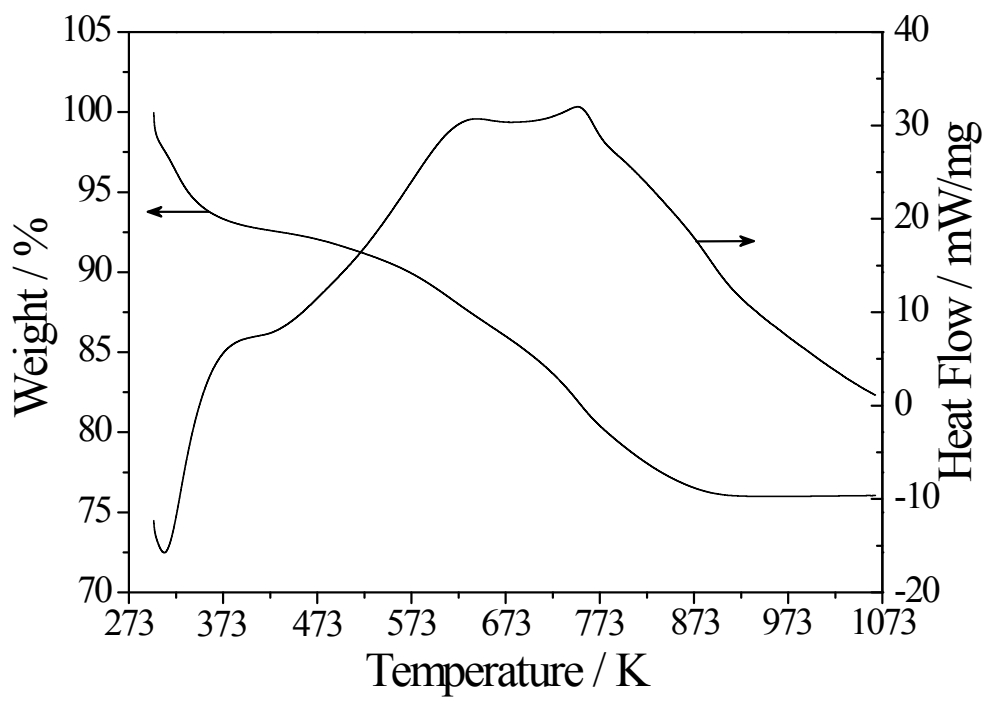

**Fig. S4** TG-DTA analysis of the used H $\beta$  zeolite.

**Table S1** Physicochemical properties of H $\beta$  zeolite before and after reaction.

| Catalyst | $A_{\text{BET}} / \text{m}^2/\text{g}$ | $A_{\text{ext}} / \text{m}^2/\text{g}$ | $V_{\text{mic}} / \text{cm}^3/\text{g}$ | Pore Size / $\text{\AA}$ |
|----------|----------------------------------------|----------------------------------------|-----------------------------------------|--------------------------|
| Before   | 457.18                                 | 114.99                                 | 0.18                                    | 27.08                    |
| After    | 293.22                                 | 95.04                                  | 0.10                                    | 25.92                    |

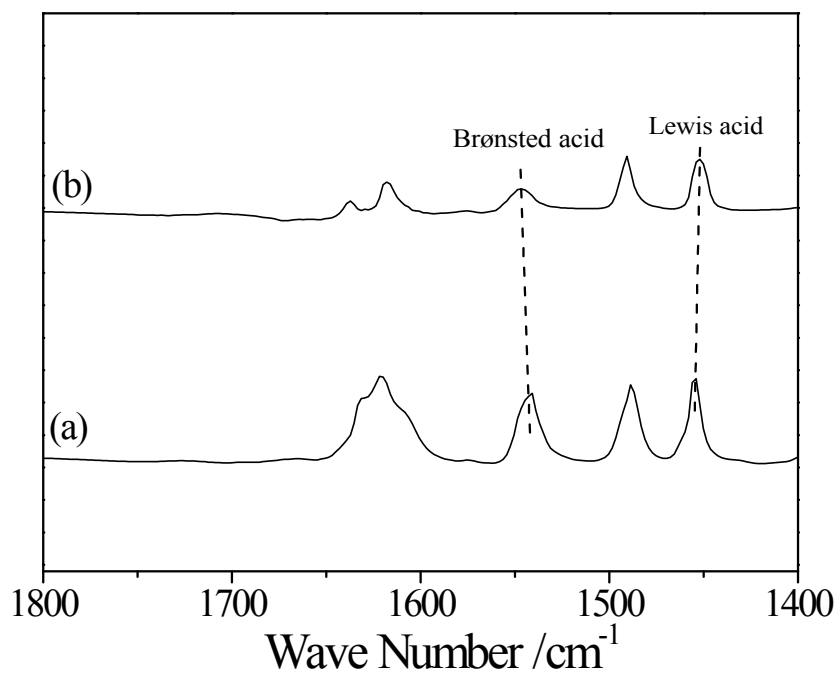

**Fig. S5** Py-IR spectrum of H $\beta$  zeolite before (a) and after reaction (b).



**Table S2** Comparison of Lewis acid and Brønsted acid content of H $\beta$  zeolite before and after reaction.

| Catalyst | Acid amount ( $\mu\text{mol}\cdot\text{g}^{-1}$ catalyst) |               | Lewis acid/Brønsted acid |
|----------|-----------------------------------------------------------|---------------|--------------------------|
|          | Lewis Acid                                                | Brønsted Acid |                          |
| Before   | 254.9                                                     | 490.7         | 0.52                     |
| After    | 139.9                                                     | 146.2         | 0.96                     |

**Table S3** Typical production of FFA from pentose and hexose in various solutions.

| No. | Substrate   | Catalyst                                 | Solution              | Yield / % | Pros and Cons                                                                           | Ref. |
|-----|-------------|------------------------------------------|-----------------------|-----------|-----------------------------------------------------------------------------------------|------|
| 1   | xylose      | H <sub>2</sub> SO <sub>4</sub>           | [BMIM]Cl              | 13.0      | Simple catalyst but with corrosive and unrecyclable. Lower yield and valuable solution. | [1]  |
| 2   | xylose      | Sn <sub>0.625</sub> Cs <sub>0.5</sub> PW | DMSO/H <sub>2</sub> O | 63.0      | Higher yield. Complex and valuable catalyst.                                            | [2]  |
| 3   | xylose      | CrPO <sub>4</sub>                        | THF/H <sub>2</sub> O  | 67.0      | Higher yield. Poisonous catalyst.                                                       | [3]  |
| 4   | xylose      | HCOOH                                    | H <sub>2</sub> O      | 74.0      | Higher yield and simple solution. Corrosive and unrecyclable catalyst.                  | [4]  |
| 5   | xylose      | SAPO-34                                  | GVL/H <sub>2</sub> O  | 40.0      | Simple system.                                                                          | [5]  |
| 6   | switchgrass | SAPO-34                                  | GVL/H <sub>2</sub> O  | 31.0      | valuable solution. Higher yield.                                                        | [5]  |
| 7   | xylose      | [EMIM][HSO <sub>4</sub> ]                | toluene               | 84.0      | Valuable catalyst and poisonous solution.                                               | [6]  |
| 8   | corncob     | H <sub>2</sub> SO <sub>4</sub>           | H <sub>2</sub> O      | 69.0      | Higher yield, simple system and simple solution. Corrosive                              | [7]  |

|    |           |             |                      |      |                                          |           |
|----|-----------|-------------|----------------------|------|------------------------------------------|-----------|
|    |           |             |                      |      | and unrecyclable catalyst.               |           |
| 9  | xylose    | H $\beta$   | GBL/H <sub>2</sub> O | 87.2 | Higher yield and                         | [8]       |
| 10 | arabinose | H $\beta$   | GBL/H <sub>2</sub> O | 76.8 | simple system.                           | [8]       |
|    |           |             |                      |      | Catalyst needs dealuminizing procedures. |           |
| 11 | glucose   | H $\beta$   | GBL/H <sub>2</sub> O | 53.2 |                                          | [8]       |
|    |           |             |                      |      | Simple system.                           |           |
| 12 | glucose   | H $\beta$   | GVL/H <sub>2</sub> O | 33.0 | Valuable solution.                       | [9]       |
|    |           |             |                      |      | Simple system.                           |           |
|    |           |             |                      |      | Lower yield,                             |           |
| 13 | glucose   | SC-CaCt-700 | GVL/H <sub>2</sub> O | 18.6 | complex catalyst and valuable solution.  | [10]      |
|    |           |             |                      |      |                                          |           |
| 14 | fructose  | H $\beta$   | GBL/H <sub>2</sub> O | 63.5 | Higher yield and simple system.          | [8]       |
|    |           |             |                      |      | Catalyst needs dealuminizing procedures. |           |
| 15 | cellulose | H $\beta$   | GVL/H <sub>2</sub> O | 38.5 |                                          | [8]       |
|    |           |             |                      |      | Simple system.                           |           |
| 16 | glucose   | H $\beta$   | THF/H <sub>2</sub> O | 35.2 | Recyclable catalyst and solution.        | This work |

---

References:

- [1] C. Sievers, I. Musin, T. Marzialelli, M. B. Valenzuela Olarte, P. K. Agrawal and C. W. Jones, *ChemSusChem.*, 2009, **2**, 665-671.
- [2] X. Guo, F. Guo, Y. Li, Z. Zheng, Z. Xing, Z. Zhu, T. Liu, X. Zhang and Y. Jin, *Appl. Catal. A-Gen.*, 2018, **558**, 18-25.
- [3] S. Xu, D. Pan, Y. Wu, X. Song, L. Gao, W. Li, L. Das and G. X, *Fuel Process. Technol.*, 2018, **175**, 90-96.
- [4] W. Yang, P. Li, D. Bo and H. Chang, *Carbohydr. Res.*, 2012, **357**, 53-61.
- [5] S. M. Bruce, Z. Zong, A. Chatzidimitriou, L. E. Avci, J. Q. Bond, M. A. Carreon and S. G. Wettstein, *J. Mol. Catal. A-Chem.*, 2016, **422**, 18-22.
- [6] S. Lima, P. Neves, M. M. Antunes, M. Pillinger, N. Ignatyev and A. A. Valente, *Appl. Catal. A-Gen.*, 2009, **363**, 93-99.
- [7] J. W. Dunning and E. C. Lathrop, *Ind. Eng. Chem.*, 1945, **37**, 24-29.
- [8] J. Cui, J. Tan, T. Deng, X. Cui, Y. Zhu and Y. Li, *Green Chem.*, 2016, **18**, 1619-1624.
- [9] E. I. Gürbüz, J. M. R. Gallo, D. M. Alonso, S. G. Wettstein, W. Y. Lim and J. A. Dumesic, *Angew. Chem. Int. Ed.*, 2013, **52**, 1270-1274.
- [10] W. Li, Y. Zhu, Y. Lu, Q. Liu, S. Guan, H. Chang, H. Jameel and L. Ma, *Bioresour. Technol.*, 2017, **245**, 258-265.
